# Supplementary material for: Two-Dimensional Layered NiLiP2S6 Crystals as an Efficient Bifunctional Electrocatalyst for Overall Water Splitting
Source: MDPI journal article supplement (doi:10.3390/catal11070786), 2021-06-28
Supplement: s1 [file s1]

## Supplementary Materials

# Two-Dimensional Layered $\text{NiLiP}_2\text{S}_6$ Crystals as an Efficient Bifunctional Electrocatalyst for Overall Water Splitting

Song-Jeng Huang <sup>1,†</sup>, Adil Muneeb <sup>1,2,†</sup>, Palani Sabhapathy <sup>3,†</sup>, Khasim Saheb Bayikadi <sup>2</sup>, Tahir Murtaza <sup>2</sup>, Kalaivanan Raju <sup>2</sup>, Li-Chyong Chen <sup>3,5,\*</sup>, Kuei-Hsien Chen <sup>3,4,\*</sup> and Sankar Raman <sup>2,3,\*</sup>

<sup>1</sup> Department of Mechanical Engineering, National Taiwan University of Science and Technology, No. 43, Section 4, Keelung Road, Taipei 10607, Taiwan; sgjghuang@mail.ntust.edu.tw (S.-J.H.); adil.munir99@gmail.com (A.M.)

<sup>2</sup> Institute of Physics, Academia Sinica, Taipei 11529, Taiwan; khasimsaheb7@gmail.com (K.S.B.); tahirkas@gmail.com (T.M.); rskalaivanan@gmail.com (K.R.)

<sup>3</sup> Center for Condensed Matter Sciences, National Taiwan University, Taipei 10617, Taiwan; sabhapathypalani@gmail.com

<sup>4</sup> Institute of Atomic and Molecular Sciences, Academia Sinica, Taipei 10617, Taiwan

<sup>5</sup> Center of Atomic Initiative for New Materials, National Taiwan University, Taipei 10617, Taiwan

\* Correspondence: chenlc@ntu.edu.tw (L.-C.C.); chenkh@pub.iams.sinica.edu.tw (K.-H.C.); sankarraman@gate.sinica.edu.tw (R.S.)

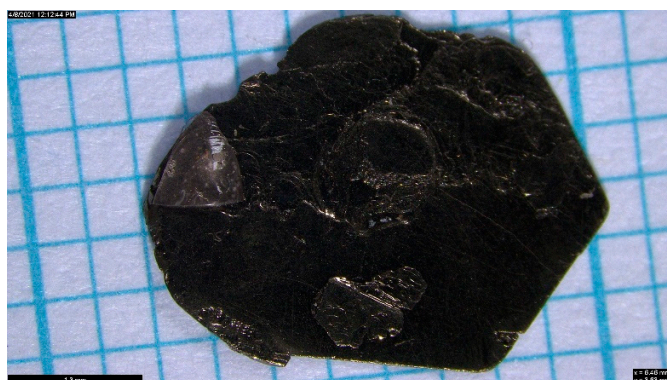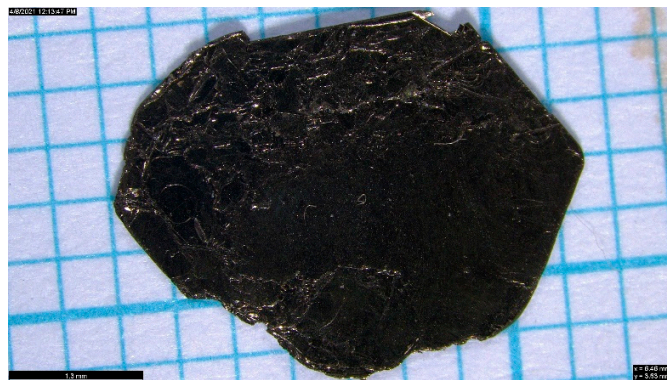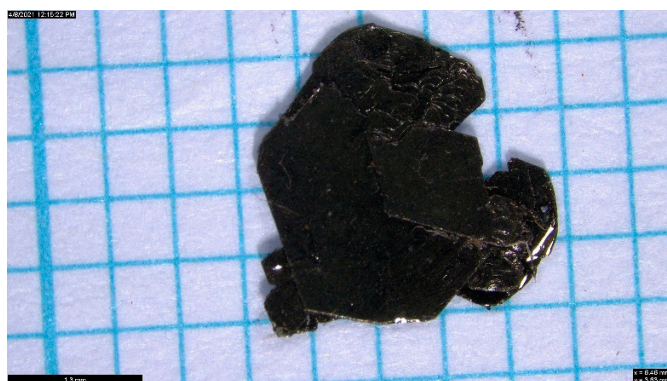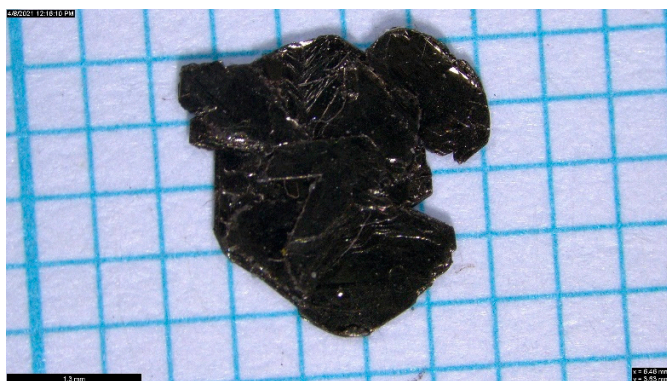

**Fig. S1.** As Synthesized NLPS crystals

**Table S1:** Crystallite size and Microstrain

| Peak Position | Crystallite Size (nm) | Microstrain ( $\epsilon$ )<br>$\times 10^{-3}$ |
|---------------|-----------------------|------------------------------------------------|
| 13.89758      | 37.65                 | 7.95                                           |
| 28.09179      | 35.29                 | 4.23                                           |
| 31.02481      | 33.18                 | 4.08                                           |
| 36.10847      | 20.34                 | 5.74                                           |
| 49.47916      | 16.09                 | 5.38                                           |
| 54.56576      | 24.53                 | 3.22                                           |
| 58.07951      | 16.14                 | 4.62                                           |

**Table S2.** Structural parameters of the catalysts obtained from Ritveld refinement of XRD powder data

|             | x                                                   | y             | z             | U      | Site | Sym. |
|-------------|-----------------------------------------------------|---------------|---------------|--------|------|------|
| 1 Li Li     | -0.26520 (3)                                        | 1.12328 (15)  | -0.06920 (18) | 0.183  | 8j   | 1    |
| 2 Ni Ni1    | -0.48580 (17)                                       | -0.04270 (4)  | 0.23828 (9)   | -0.020 | 8j   | 1    |
| 3 P P1      | 0.26806 (2)                                         | 0.04941 (3)   | 0.54818 (6)   | 0.208  | 8j   | 1    |
| 4 P P2      | 0.27746 (15)                                        | -0.29010 (10) | 0.57554 (7)   | -0.054 | 8j   | 1    |
| 5 S S1      | 0.49264 (12)                                        | 0.65081 (5)   | 0.75857 (5)   | 0.024  | 8j   | 1    |
| 6 S S2      | 0.12902 (9)                                         | 0.11480 (5)   | 0.30761 (5)   | 0.041  | 8j   | 1    |
| 7 S S3      | 1.03714 (7)                                         | 1.01168 (7)   | -0.23800 (17) | 0.324  | 8j   | 1    |
| 8 S S4      | -0.34170 (12)                                       | 0.27751 (3)   | 0.49156 (7)   | 0.393  | 8j   | 1    |
| 9 S S5      | -0.84110 (11)                                       | 0.17045 (9)   | -0.21370 (5)  | 0.046  | 8j   | 1    |
| 10 S S6     | 0.06483 (8)                                         | 0.06686 (7)   | 0.87629 (5)   | -0.050 | 8j   | 1    |
| <b>NLPS</b> | V = 864.34 (11) Å <sup>3</sup>                      |               |               |        |      |      |
|             | Bragg R-factor: 1.952 RF-factor: 1.052              |               |               |        |      |      |
|             | <b>Note: values in bracket shows the deviations</b> |               |               |        |      |      |

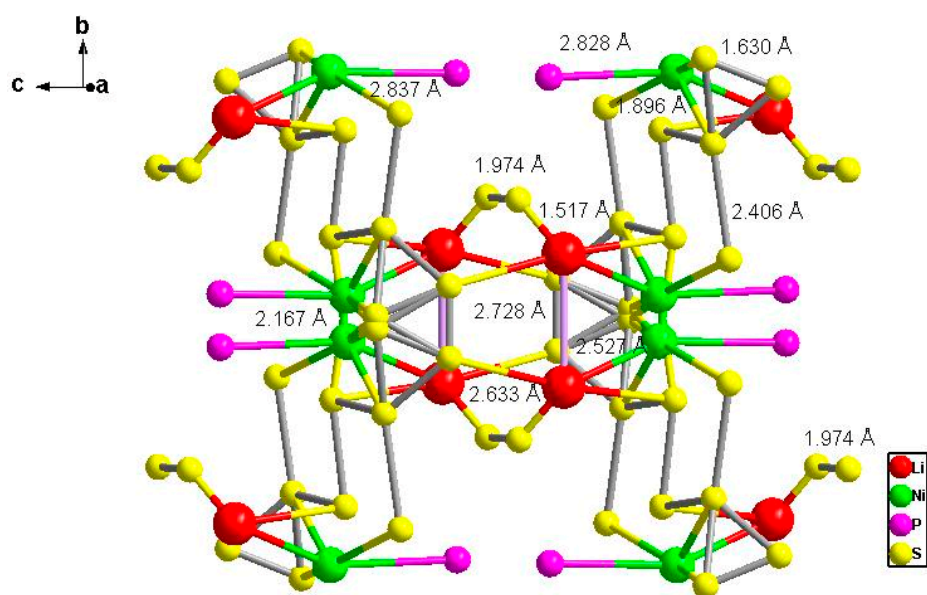

**Fig. S2.** Inter-atomic distances between individual atoms.

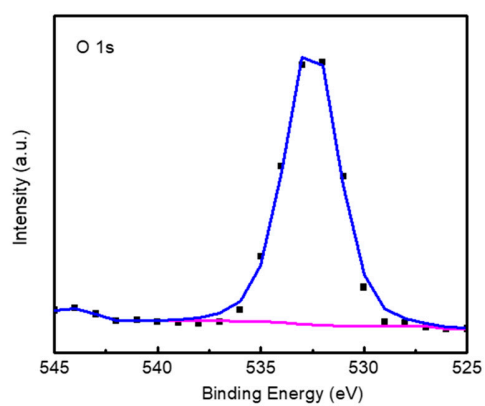

**Fig. S3.** O 1s spectra of NLPS

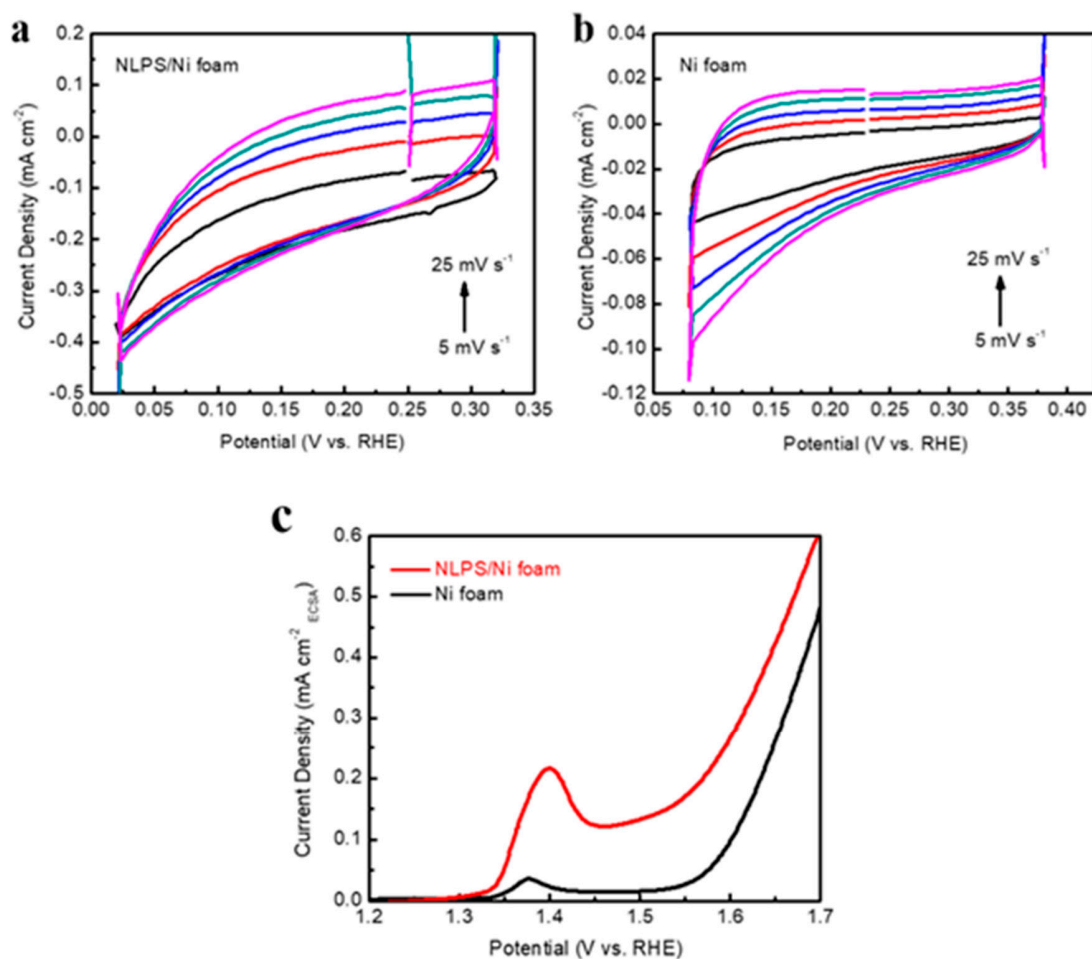

**Fig. S4.** Cyclic voltammetry at different scan rates (a) NLPS. (b) Ni foam and (c) Overall water splitting of NLPS/Ni foam and Ni foam (Current density was normalized by ECSA)

## Supplementary Methods

**Calculation of ECSA.** The calculation of electrochemically active surface area (ECSA) is based on the measured double layer capacitance of the NLPS/Ni foam and Ni foam electrode in 1 M KOH according to a previous published report.<sup>1</sup> Briefly, a potential range where no apparent Faradaic process happened was determined firstly using the static CV. The charging current  $i_c$  was measured from the CVs at different scan rates, as shown

in Fig. S4a and b. The relation between  $i_c$ , the scan rate ( $v$ ) and the double layer capacitance ( $C_{dl}$ ) was given in eq 1.

$$i_c = vC_{dl} \quad (1)$$

The electrochemical double-layer capacitance ( $C_{dl}$ ) was determined from the scan-rate dependence of CVs in a potential range where there is no Faradic current. For NLPS/Ni foam,  $C_{dl} = 3.6 \text{ mF cm}^{-2}$  and for Ni foam  $C_{dl} = 0.8 \text{ mF cm}^{-2}$ . The ECSA can be calculated from the  $C_{dl}$  according to:

$$ECSA = \frac{C_{dl}}{C_s} \quad (2)$$

where  $C_s$  is the specific capacitance of a flat standard electrode is  $C_s = 0.040 \text{ mF cm}^{-2}$  in 1 M NaOH is adopted from previous reports.<sup>2</sup> As a result, the ECSA of the NLPS/Ni foam and Ni foam are calculated to be  $90 \text{ cm}^2$  and  $20 \text{ cm}^2$  according to eq 2. For ECSA normalized activity, the overall water splitting current density was divided by ECSA and the data was presented in **Figure S4c**.

#### References:

1. Sabhapathy, P.; Liao, C.C.; Chen, W.F.; Chou, T.C.; Shown, I.; Sabbah, A.; Lin, Y.G.; Lee, J.F.; Tsai, M.K.; Chen, K.H.; Chen, L.C. Highly Efficient Nitrogen and Carbon Coordinated N-Co-C Electrocatalyst on Reduced Graphene Oxide Derived from Vitamin-B12 for Hydrogen Evolution Reaction. *J. Mater. Chem. A*, **2019**, 7, 7179–7185, doi.org/10.1039/C8TA10935D.
2. Kibsgaard, J.; Jaramillo, T.F. Molybdenum Phosphosulfide: An Active, Acid-Stable, Earth-Abundant Catalyst for the Hydrogen Evolution Reaction. *Angew. Chem. Int. Ed.*, **2014**, 53, 14433–14437, doi.org/10.1002/anie.201408222
